# Supplementary figures and images for: Fungal metabolite (+)-terrein suppresses IL-6/sIL-6R-induced CSF1 secretion by inhibiting JAK1 phosphorylation in human gingival fibroblasts
Source: PubMed Central journal article supplement — Heliyon. 2018 Nov 26;4(11):e00979. doi: 10.1016/j.heliyon.2018.e00979 (PMC6260243; doi:10.1016/j.heliyon.2018.e00979), 2018-11-26

**A**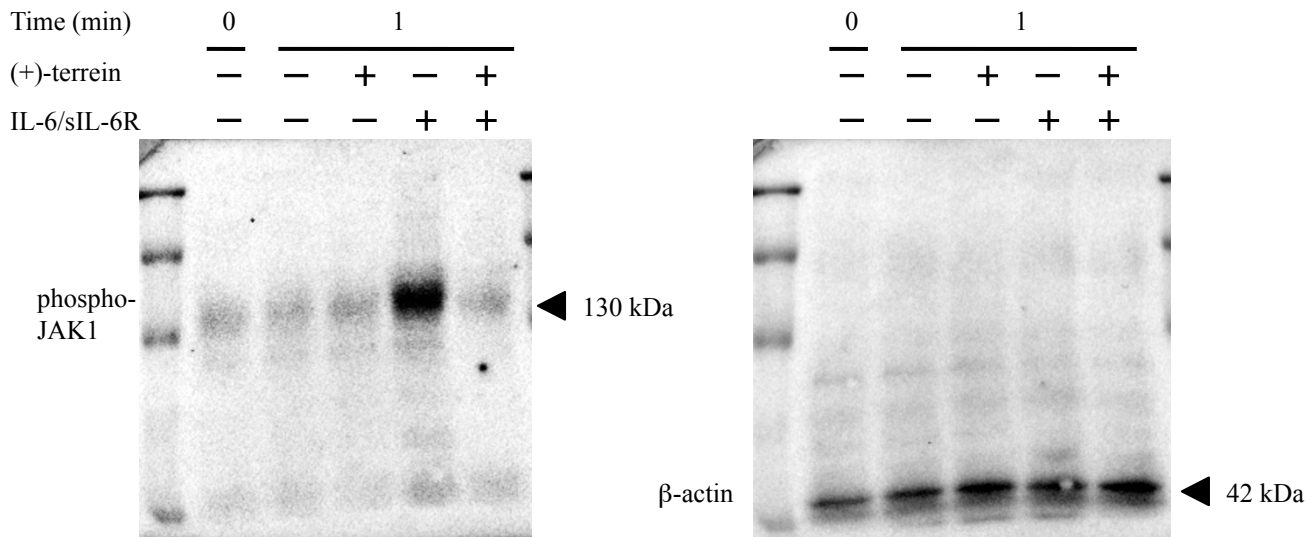**B**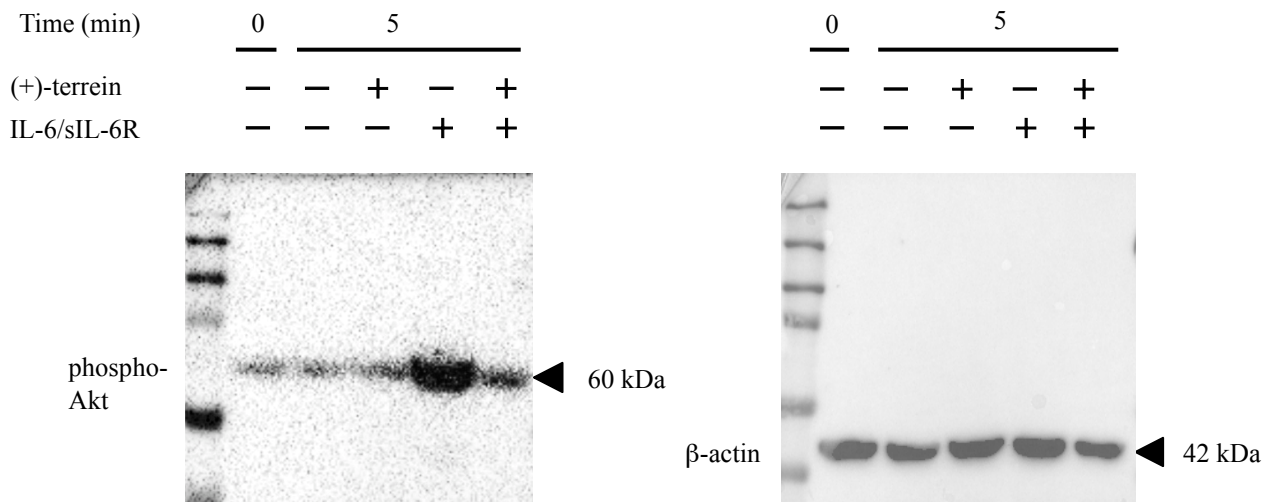**C**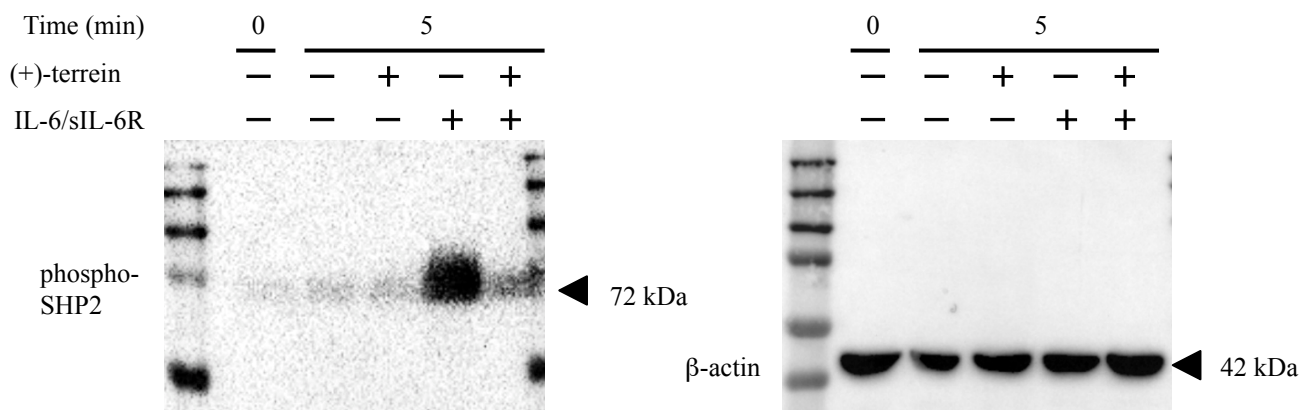

Supplement: mmc1.pdf [file mmc1.pdf]
